# Supplementary material
Source: publisher figshare collection journal article supplement (https://acs.figshare.com/ndownloader/files/4732840)
Supplement: Supplementary file 1 [file 4732840]

 
data_gg1503csmdis1
 
_audit_creation_method            SHELXL-97 
_chemical_name_systematic 
; 
 ? 
; 
_chemical_name_common             ? 
_chemical_melting_point           ? 
_chemical_formula_moiety          'C54 H46 O6, C6 H6'
_chemical_formula_sum             
 'C60 H52 O6'
_chemical_formula_weight          869.02 
 
loop_ 
 _atom_type_symbol 
 _atom_type_description 
 _atom_type_scat_dispersion_real 
 _atom_type_scat_dispersion_imag 
 _atom_type_scat_source 
 'C'  'C'   0.0033   0.0016 
 'International Tables Vol C Tables 4.2.6.8 and 6.1.1.4' 
 'H'  'H'   0.0000   0.0000 
 'International Tables Vol C Tables 4.2.6.8 and 6.1.1.4' 
 'O'  'O'   0.0106   0.0060 
 'International Tables Vol C Tables 4.2.6.8 and 6.1.1.4' 
 
_symmetry_cell_setting            Triclinic 
_symmetry_space_group_name_H-M    P-1
_symmetry_space_group_name_Hall   '-P 1'  
 
loop_ 
 _symmetry_equiv_pos_as_xyz 
 'x, y, z' 
 '-x, -y, -z' 
 
_cell_length_a                    7.116(4) 
_cell_length_b                    10.145(5) 
_cell_length_c                    17.823(9) 
_cell_angle_alpha                 77.253(9) 
_cell_angle_beta                  80.996(8) 
_cell_angle_gamma                 73.084(8) 
_cell_volume                      1194.7(10) 
_cell_formula_units_Z             1 
_cell_measurement_temperature     298(2) 
_cell_measurement_reflns_used     ? 
_cell_measurement_theta_min       ? 
_cell_measurement_theta_max       ? 
 
_exptl_crystal_description        Plate
_exptl_crystal_colour             colorless
_exptl_crystal_size_max           0.35 
_exptl_crystal_size_mid           0.20 
_exptl_crystal_size_min           0.10 
_exptl_crystal_density_meas       ? 
_exptl_crystal_density_diffrn     1.208 
_exptl_crystal_density_method     'not measured' 
_exptl_crystal_F_000              460 
_exptl_absorpt_coefficient_mu     0.077 
_exptl_absorpt_correction_type    'Multi-Scan'
_exptl_absorpt_correction_T_min   0.9736 
_exptl_absorpt_correction_T_max   0.9924 
_exptl_absorpt_process_details    'Sadabs (Bruker)'
_exptl_special_details 
; 
 ? 
; 
 
_diffrn_ambient_temperature       298(2) 
_diffrn_radiation_wavelength      0.71073 
_diffrn_radiation_type            MoK\a 
_diffrn_radiation_source          'fine-focus sealed tube' 
_diffrn_radiation_monochromator   graphite 
_diffrn_measurement_device_type   'CCD area detector'
_diffrn_measurement_method        'phi and omega scans'
_diffrn_detector_area_resol_mean  ? 
_diffrn_standards_number          ? 
_diffrn_standards_interval_count  ? 
_diffrn_standards_interval_time   ? 
_diffrn_standards_decay_%         ? 
_diffrn_reflns_number             5602 
_diffrn_reflns_av_R_equivalents   0.0710 
_diffrn_reflns_av_sigmaI/netI     0.1744 
_diffrn_reflns_limit_h_min        -7 
_diffrn_reflns_limit_h_max        7 
_diffrn_reflns_limit_k_min        -10 
_diffrn_reflns_limit_k_max        11 
_diffrn_reflns_limit_l_min        -19 
_diffrn_reflns_limit_l_max        19 
_diffrn_reflns_theta_min          2.24 
_diffrn_reflns_theta_max          23.10 
_reflns_number_total              3274 
_reflns_number_gt                 1365 
_reflns_threshold_expression      >2sigma(I) 

_computing_data_collection        'Bruker SMART'
_computing_cell_refinement        'Bruker SMART'
_computing_data_reduction         'Bruker SAINT' 
_computing_structure_solution     'SHELXS-97 (Sheldrick, 1990)' 
_computing_structure_refinement   'SHELXL-97 (Sheldrick, 1997)' 
_computing_molecular_graphics     'Bruker SHELXTL' 
_computing_publication_material   'Bruker SHELXTL'
_refine_special_details 
; 
 Refinement of F^2^ against ALL reflections.  The weighted R-factor wR and 
 goodness of fit S are based on F^2^, conventional R-factors R are based 
 on F, with F set to zero for negative F^2^. The threshold expression of 
 F^2^ > 2sigma(F^2^) is used only for calculating R-factors(gt) etc. and is 
 not relevant to the choice of reflections for refinement.  R-factors based 
 on F^2^ are statistically about twice as large as those based on F, and R- 
 factors based on ALL data will be even larger.  Because intensities of 
 reflections at higher theta were low and imprecise, data beyond theta of
 23.1 degrees was omitted in refinement.  Solvent benzene was modeled as two
 C3H3 rigid bodies (occupancy 0.5 each) with restrained distances across 
 the center of symmetry at 0, 1/2, 1/2. 
 Comments:  CheckCIF reports that theta full is too low (the result of 
 limiting theta to improve goodness of fit).  Other checkCIF alerts are 
 related (sine (theta_max)/wavelength too low), resolution too low) and
 others may indicate further disorder (large non-solvent Ueq(max)/Ueq(min),
 low Ueq as compared to neighbors for C3).  Certainly the quality of the
 structure is low. 
; 
 
_refine_ls_structure_factor_coef  Fsqd  
_refine_ls_matrix_type            full 
_refine_ls_weighting_scheme       calc  
_refine_ls_weighting_details 
 'calc w=1/[\s^2^(Fo^2^)+(0.0663P)^2^+0.0000P] where P=(Fo^2^+2Fc^2^)/3' 
_atom_sites_solution_primary      direct 
_atom_sites_solution_secondary    difmap 
_atom_sites_solution_hydrogens    geom 
_refine_ls_hydrogen_treatment     constr
_refine_ls_extinction_method      none 
_refine_ls_extinction_coef        ? 
_refine_ls_number_reflns          3274 
_refine_ls_number_parameters      284 
_refine_ls_number_restraints      4 
_refine_ls_R_factor_all           0.1684 
_refine_ls_R_factor_gt            0.0649 
_refine_ls_wR_factor_ref          0.1668 
_refine_ls_wR_factor_gt           0.1335 
_refine_ls_goodness_of_fit_ref    0.865 
_refine_ls_restrained_S_all       0.865 
_refine_ls_shift/su_max           0.039 
_refine_ls_shift/su_mean          0.001 
 
loop_ 
 _atom_site_label 
 _atom_site_type_symbol 
 _atom_site_fract_x 
 _atom_site_fract_y 
 _atom_site_fract_z 
 _atom_site_U_iso_or_equiv 
 _atom_site_adp_type 
 _atom_site_occupancy 
 _atom_site_symmetry_multiplicity 
 _atom_site_calc_flag 
 _atom_site_refinement_flags 
 _atom_site_disorder_assembly 
 _atom_site_disorder_group 
O1 O 1.0365(5) -0.2439(4) 0.1142(2) 0.0881(13) Uani 1 1 d . . . 
O2 O 0.3555(5) 0.3861(4) 0.0046(2) 0.0825(12) Uani 1 1 d . . . 
O3 O 0.4491(5) 0.5318(4) 0.3247(2) 0.0773(12) Uani 1 1 d . . . 
C1 C 0.1979(7) -0.0576(6) 0.5047(3) 0.0619(15) Uani 1 1 d . . . 
H1 H 0.3323 -0.0968 0.5088 0.074 Uiso 1 1 calc R . . 
C2 C -0.0658(8) 0.0794(6) 0.4316(3) 0.0626(15) Uani 1 1 d . . . 
H2 H -0.1115 0.1339 0.3855 0.075 Uiso 1 1 calc R . . 
C3 C 0.1364(7) 0.0201(5) 0.4360(3) 0.0416(12) Uani 1 1 d . . . 
C4 C 0.2752(7) 0.0436(5) 0.3706(3) 0.0492(13) Uani 1 1 d . . . 
C5 C 0.3922(7) 0.0628(5) 0.3162(3) 0.0469(13) Uani 1 1 d . . . 
C6 C 0.5399(6) 0.0854(5) 0.2487(2) 0.0365(12) Uani 1 1 d . . . 
C7 C 0.4329(6) 0.1219(5) 0.1753(3) 0.0390(12) Uani 1 1 d . . . 
C8 C 0.4384(6) 0.2376(6) 0.1204(3) 0.0461(13) Uani 1 1 d . . . 
H8 H 0.5066 0.2988 0.1274 0.055 Uiso 1 1 calc R . . 
C9 C 0.3434(7) 0.2658(6) 0.0538(3) 0.0519(14) Uani 1 1 d . . . 
C10 C 0.2468(6) 0.1726(6) 0.0414(3) 0.0581(15) Uani 1 1 d . . . 
H10 H 0.1870 0.1885 -0.0037 0.070 Uiso 1 1 calc R . . 
C11 C 0.2419(6) 0.0580(6) 0.0969(3) 0.0611(15) Uani 1 1 d . . . 
H11 H 0.1744 -0.0033 0.0894 0.073 Uiso 1 1 calc R . . 
C12 C 0.3323(6) 0.0283(5) 0.1637(3) 0.0480(13) Uani 1 1 d . . . 
H12 H 0.3271 -0.0517 0.2005 0.058 Uiso 1 1 calc R . . 
C13 C 0.7083(6) -0.0493(5) 0.2506(3) 0.0413(12) Uani 1 1 d . . . 
C14 C 0.7981(7) -0.0946(5) 0.1835(3) 0.0511(13) Uani 1 1 d . . . 
H14 H 0.7498 -0.0470 0.1367 0.061 Uiso 1 1 calc R . . 
C15 C 0.9605(7) -0.2108(6) 0.1849(4) 0.0554(14) Uani 1 1 d . . . 
C16 C 1.0343(7) -0.2793(6) 0.2535(4) 0.0668(16) Uani 1 1 d . . . 
H16 H 1.1434 -0.3568 0.2549 0.080 Uiso 1 1 calc R . . 
C17 C 0.9466(8) -0.2329(6) 0.3199(4) 0.0721(17) Uani 1 1 d . . . 
H17 H 0.9968 -0.2796 0.3666 0.086 Uiso 1 1 calc R . . 
C18 C 0.7844(7) -0.1178(6) 0.3193(3) 0.0566(14) Uani 1 1 d . . . 
H18 H 0.7272 -0.0869 0.3651 0.068 Uiso 1 1 calc R . . 
C19 C 0.6221(6) 0.2055(5) 0.2561(2) 0.0408(12) Uani 1 1 d . . . 
C20 C 0.5082(6) 0.3183(5) 0.2877(2) 0.0457(13) Uani 1 1 d . . . 
H20 H 0.3785 0.3198 0.3070 0.055 Uiso 1 1 calc R . . 
C21 C 0.5773(7) 0.4279(5) 0.2920(3) 0.0506(13) Uani 1 1 d . . . 
C22 C 0.7722(7) 0.4282(5) 0.2650(3) 0.0552(14) Uani 1 1 d . . . 
H22 H 0.8229 0.5010 0.2688 0.066 Uiso 1 1 calc R . . 
C23 C 0.8840(7) 0.3184(6) 0.2329(3) 0.0554(14) Uani 1 1 d . . . 
H23 H 1.0136 0.3177 0.2138 0.067 Uiso 1 1 calc R . . 
C24 C 0.8165(6) 0.2080(5) 0.2272(2) 0.0502(13) Uani 1 1 d . . . 
H24 H 0.8990 0.1351 0.2042 0.060 Uiso 1 1 calc R . . 
C25 C 1.2160(8) -0.3567(8) 0.1116(4) 0.142(3) Uani 1 1 d . . . 
H25A H 1.3076 -0.3450 0.1422 0.213 Uiso 1 1 calc R . . 
H25B H 1.2736 -0.3550 0.0590 0.213 Uiso 1 1 calc R . . 
H25C H 1.1858 -0.4449 0.1317 0.213 Uiso 1 1 calc R . . 
C26 C 0.2613(8) 0.4249(7) -0.0650(3) 0.105(2) Uani 1 1 d . . . 
H26A H 0.3144 0.3530 -0.0955 0.158 Uiso 1 1 calc R . . 
H26B H 0.2840 0.5117 -0.0937 0.158 Uiso 1 1 calc R . . 
H26C H 0.1219 0.4361 -0.0526 0.158 Uiso 1 1 calc R . . 
C27 C 0.5052(8) 0.6528(6) 0.3277(3) 0.0864(19) Uani 1 1 d . . . 
H27A H 0.6199 0.6263 0.3554 0.130 Uiso 1 1 calc R . . 
H27B H 0.3989 0.7146 0.3537 0.130 Uiso 1 1 calc R . . 
H27C H 0.5348 0.6998 0.2761 0.130 Uiso 1 1 calc R . . 
C1S C 0.1996(16) 0.4750(15) 0.4864(10) 0.1085(17) Uiso 0.50 1 d PGD . 1 
H1S H 0.3367 0.4535 0.4796 0.130 Uiso 0.50 1 d PG . 1 
C2S C 0.0933(16) 0.5792(15) 0.5276(9) 0.1085(17) Uiso 0.50 1 d PG . 1 
H2S H 0.1593 0.6275 0.5483 0.130 Uiso 0.50 1 d PG . 1 
C3S C -0.1116(16) 0.6113(16) 0.5378(11) 0.1085(17) Uiso 0.50 1 d PGD . 1 
H3S H -0.1827 0.6810 0.5653 0.130 Uiso 0.50 1 d PG . 1 
C1SA C -0.2060(14) 0.5762(15) 0.5155(10) 0.1085(17) Uiso 0.50 1 d PGD . 2 
H1SA H -0.3382 0.6224 0.5256 0.130 Uiso 0.50 1 d PG . 2 
C2SA C -0.1548(13) 0.4595(14) 0.4804(9) 0.1085(17) Uiso 0.50 1 d PG . 2 
H2SA H -0.2528 0.4275 0.4670 0.130 Uiso 0.50 1 d PG . 2 
C3SA C 0.0428(15) 0.3904(16) 0.4652(11) 0.1085(17) Uiso 0.50 1 d PGD . 2 
H3SA H 0.0771 0.3123 0.4417 0.130 Uiso 0.50 1 d PG . 2 
 
loop_ 
 _atom_site_aniso_label 
 _atom_site_aniso_U_11 
 _atom_site_aniso_U_22 
 _atom_site_aniso_U_33 
 _atom_site_aniso_U_23 
 _atom_site_aniso_U_13 
 _atom_site_aniso_U_12 
O1 0.046(2) 0.108(3) 0.115(3) -0.062(3) -0.011(2) 0.006(2) 
O2 0.096(3) 0.097(3) 0.059(2) 0.019(2) -0.035(2) -0.043(2) 
O3 0.052(2) 0.061(3) 0.133(3) -0.043(3) -0.005(2) -0.020(2) 
C1 0.034(3) 0.097(5) 0.050(4) -0.002(3) 0.001(3) -0.022(3) 
C2 0.045(4) 0.096(5) 0.042(3) 0.005(3) -0.007(3) -0.022(3) 
C3 0.041(3) 0.057(3) 0.030(3) -0.006(3) 0.005(3) -0.026(3) 
C4 0.046(3) 0.057(4) 0.050(3) -0.019(3) 0.003(3) -0.018(3) 
C5 0.042(3) 0.053(4) 0.049(3) -0.017(3) -0.001(3) -0.016(3) 
C6 0.031(3) 0.043(3) 0.033(3) -0.001(2) 0.001(2) -0.013(3) 
C7 0.022(3) 0.047(3) 0.043(3) -0.007(3) 0.001(2) -0.005(2) 
C8 0.034(3) 0.065(4) 0.040(3) -0.005(3) -0.004(2) -0.017(3) 
C9 0.047(3) 0.059(4) 0.042(3) 0.006(3) -0.001(3) -0.016(3) 
C10 0.047(3) 0.089(5) 0.046(3) -0.012(3) -0.008(3) -0.028(3) 
C11 0.044(3) 0.079(5) 0.065(4) -0.012(4) -0.009(3) -0.023(3) 
C12 0.042(3) 0.055(4) 0.047(3) 0.001(3) -0.007(3) -0.019(3) 
C13 0.032(3) 0.045(3) 0.049(3) -0.003(3) -0.009(3) -0.014(3) 
C14 0.033(3) 0.057(4) 0.061(4) -0.008(3) -0.015(3) -0.005(3) 
C15 0.038(3) 0.055(4) 0.077(4) -0.016(3) -0.014(3) -0.011(3) 
C16 0.032(3) 0.057(4) 0.108(5) -0.005(4) -0.024(4) -0.005(3) 
C17 0.052(4) 0.076(5) 0.082(5) 0.012(4) -0.029(3) -0.015(4) 
C18 0.046(3) 0.061(4) 0.058(4) 0.004(3) -0.011(3) -0.016(3) 
C19 0.034(3) 0.049(4) 0.039(3) -0.003(3) -0.009(2) -0.011(3) 
C20 0.029(3) 0.047(3) 0.064(3) -0.007(3) -0.009(2) -0.015(3) 
C21 0.039(3) 0.047(4) 0.067(4) -0.016(3) -0.013(3) -0.006(3) 
C22 0.049(4) 0.050(4) 0.070(4) -0.001(3) -0.015(3) -0.022(3) 
C23 0.039(3) 0.059(4) 0.071(4) 0.003(3) -0.006(3) -0.028(3) 
C24 0.029(3) 0.061(4) 0.058(3) -0.013(3) 0.004(2) -0.010(3) 
C25 0.051(4) 0.157(7) 0.217(8) -0.110(6) -0.014(5) 0.028(5) 
C26 0.112(5) 0.133(6) 0.068(4) 0.032(4) -0.041(4) -0.050(5) 
C27 0.087(4) 0.054(4) 0.131(5) -0.025(4) -0.027(4) -0.023(4) 
 
_geom_special_details 
; 
 All esds (except the esd in the dihedral angle between two l.s. planes) 
 are estimated using the full covariance matrix.  The cell esds are taken 
 into account individually in the estimation of esds in distances, angles 
 and torsion angles; correlations between esds in cell parameters are only 
 used when they are defined by crystal symmetry.  An approximate (isotropic) 
 treatment of cell esds is used for estimating esds involving l.s. planes. 
; 
 
loop_ 
 _geom_bond_atom_site_label_1 
 _geom_bond_atom_site_label_2 
 _geom_bond_distance 
 _geom_bond_site_symmetry_2 
 _geom_bond_publ_flag 
O1 C15 1.364(5) . ? 
O1 C25 1.448(6) . ? 
O2 C9 1.354(5) . ? 
O2 C26 1.426(5) . ? 
O3 C21 1.352(5) . ? 
O3 C27 1.410(5) . ? 
C1 C3 1.361(6) . ? 
C1 C2 1.377(5) 2_556 ? 
C1 H1 0.9300 . ? 
C2 C1 1.377(5) 2_556 ? 
C2 C3 1.396(6) . ? 
C2 H2 0.9300 . ? 
C3 C4 1.430(6) . ? 
C4 C5 1.196(5) . ? 
C5 C6 1.492(6) . ? 
C6 C13 1.531(6) . ? 
C6 C19 1.535(6) . ? 
C6 C7 1.537(5) . ? 
C7 C8 1.358(6) . ? 
C7 C12 1.408(6) . ? 
C8 C9 1.392(6) . ? 
C8 H8 0.9300 . ? 
C9 C10 1.390(6) . ? 
C10 C11 1.354(6) . ? 
C10 H10 0.9300 . ? 
C11 C12 1.376(6) . ? 
C11 H11 0.9300 . ? 
C12 H12 0.9300 . ? 
C13 C14 1.371(5) . ? 
C13 C18 1.374(6) . ? 
C14 C15 1.389(6) . ? 
C14 H14 0.9300 . ? 
C15 C16 1.366(7) . ? 
C16 C17 1.362(6) . ? 
C16 H16 0.9300 . ? 
C17 C18 1.381(7) . ? 
C17 H17 0.9300 . ? 
C18 H18 0.9300 . ? 
C19 C20 1.373(5) . ? 
C19 C24 1.404(5) . ? 
C20 C21 1.361(6) . ? 
C20 H20 0.9300 . ? 
C21 C22 1.396(6) . ? 
C22 C23 1.350(6) . ? 
C22 H22 0.9300 . ? 
C23 C24 1.369(6) . ? 
C23 H23 0.9300 . ? 
C24 H24 0.9300 . ? 
C25 H25A 0.9600 . ? 
C25 H25B 0.9600 . ? 
C25 H25C 0.9600 . ? 
C26 H26A 0.9600 . ? 
C26 H26B 0.9600 . ? 
C26 H26C 0.9600 . ? 
C27 H27A 0.9600 . ? 
C27 H27B 0.9600 . ? 
C27 H27C 0.9600 . ? 
C1S C3S 1.383(16) 2_566 ? 
C1S C2S 1.3900 . ? 
C1S H1S 0.9300 . ? 
C2S C3S 1.3900 . ? 
C2S H2S 0.9300 . ?  
C3S H3S 0.9300 . ? 
C1SA C2SA 1.3900 . ? 
C1SA C3SA 1.409(17) 2_566 ?  
C1SA H1SA 0.9300 . ? 
C2SA C3SA 1.3900 . ? 
C2SA H2SA 0.9300 . ? 
C3SA H3SA 0.9300 . ? 
 
loop_ 
 _geom_angle_atom_site_label_1 
 _geom_angle_atom_site_label_2 
 _geom_angle_atom_site_label_3 
 _geom_angle 
 _geom_angle_site_symmetry_1 
 _geom_angle_site_symmetry_3 
 _geom_angle_publ_flag 
C15 O1 C25 117.0(5) . . ? 
C9 O2 C26 119.4(4) . . ? 
C21 O3 C27 120.2(4) . . ? 
C3 C1 C2 121.5(4) . 2_556 ? 
C3 C1 H1 119.2 . . ? 
C2 C1 H1 119.2 2_556 . ? 
C1 C2 C3 120.3(4) 2_556 . ? 
C1 C2 H2 119.9 2_556 . ? 
C3 C2 H2 119.9 . . ? 
C1 C3 C2 118.2(4) . . ? 
C1 C3 C4 121.0(5) . . ? 
C2 C3 C4 120.8(5) . . ? 
C5 C4 C3 179.6(6) . . ? 
C4 C5 C6 179.3(6) . . ? 
C5 C6 C13 108.2(4) . . ? 
C5 C6 C19 108.9(3) . . ? 
C13 C6 C19 109.1(3) . . ? 
C5 C6 C7 107.3(3) . . ? 
C13 C6 C7 112.1(3) . . ? 
C19 C6 C7 111.1(4) . . ? 
C8 C7 C12 119.3(4) . . ? 
C8 C7 C6 122.4(4) . . ? 
C12 C7 C6 118.3(4) . . ? 
C7 C8 C9 120.9(5) . . ? 
C7 C8 H8 119.6 . . ? 
C9 C8 H8 119.6 . . ? 
O2 C9 C10 124.7(5) . . ? 
O2 C9 C8 115.2(5) . . ? 
C10 C9 C8 120.1(5) . . ? 
C11 C10 C9 118.3(5) . . ? 
C11 C10 H10 120.9 . . ? 
C9 C10 H10 120.9 . . ? 
C10 C11 C12 122.9(5) . . ? 
C10 C11 H11 118.6 . . ? 
C12 C11 H11 118.6 . . ? 
C11 C12 C7 118.5(5) . . ? 
C11 C12 H12 120.7 . . ? 
C7 C12 H12 120.7 . . ? 
C14 C13 C18 119.2(5) . . ? 
C14 C13 C6 120.8(4) . . ? 
C18 C13 C6 119.6(4) . . ? 
C13 C14 C15 120.7(5) . . ? 
C13 C14 H14 119.7 . . ? 
C15 C14 H14 119.7 . . ? 
O1 C15 C16 125.5(5) . . ? 
O1 C15 C14 114.7(5) . . ? 
C16 C15 C14 119.8(5) . . ? 
C17 C16 C15 119.4(5) . . ? 
C17 C16 H16 120.3 . . ? 
C15 C16 H16 120.3 . . ? 
C16 C17 C18 121.4(5) . . ? 
C16 C17 H17 119.3 . . ? 
C18 C17 H17 119.3 . . ? 
C13 C18 C17 119.5(5) . . ? 
C13 C18 H18 120.2 . . ? 
C17 C18 H18 120.2 . . ? 
C20 C19 C24 116.8(4) . . ? 
C20 C19 C6 122.1(4) . . ? 
C24 C19 C6 121.0(4) . . ? 
C21 C20 C19 122.7(4) . . ? 
C21 C20 H20 118.7 . . ? 
C19 C20 H20 118.7 . . ? 
O3 C21 C20 116.4(4) . . ? 
O3 C21 C22 123.2(5) . . ? 
C20 C21 C22 120.3(5) . . ? 
C23 C22 C21 117.2(5) . . ? 
C23 C22 H22 121.4 . . ? 
C21 C22 H22 121.4 . . ? 
C22 C23 C24 123.4(5) . . ? 
C22 C23 H23 118.3 . . ? 
C24 C23 H23 118.3 . . ? 
C23 C24 C19 119.7(4) . . ? 
C23 C24 H24 120.2 . . ? 
C19 C24 H24 120.2 . . ? 
O1 C25 H25A 109.5 . . ? 
O1 C25 H25B 109.5 . . ? 
H25A C25 H25B 109.5 . . ? 
O1 C25 H25C 109.5 . . ? 
H25A C25 H25C 109.5 . . ? 
H25B C25 H25C 109.5 . . ? 
O2 C26 H26A 109.5 . . ? 
O2 C26 H26B 109.5 . . ? 
H26A C26 H26B 109.5 . . ? 
O2 C26 H26C 109.5 . . ? 
H26A C26 H26C 109.5 . . ? 
H26B C26 H26C 109.5 . . ? 
O3 C27 H27A 109.5 . . ? 
O3 C27 H27B 109.5 . . ? 
H27A C27 H27B 109.5 . . ? 
O3 C27 H27C 109.5 . . ? 
H27A C27 H27C 109.5 . . ? 
H27B C27 H27C 109.5 . . ? 
C3S C1S C2S 122.4(14) 2_566 . ? 
C1S C2S C3S 120.0 . . ? 
C1S C3S C2S 117.1(11) 2_566 . ? 
C2SA C1SA C3SA 113.7(13) . 2_566 ? 
C2SA C1SA H1SA 120.0 . . ? 
C3SA C1SA H1SA 126.2 2_566 . ? 
C1SA C2SA C3SA 120.0 . . ? 
C1SA C2SA H2SA 120.0 . . ? 
C3SA C2SA H2SA 120.0 . . ? 
C2SA C3SA C1SA 126.2(11) . 2_566 ? 
C2SA C3SA H3SA 120.0 . . ? 
C1SA C3SA H3SA 113.7 2_566 . ? 
 
loop_ 
 _geom_torsion_atom_site_label_1 
 _geom_torsion_atom_site_label_2 
 _geom_torsion_atom_site_label_3 
 _geom_torsion_atom_site_label_4 
 _geom_torsion 
 _geom_torsion_site_symmetry_1 
 _geom_torsion_site_symmetry_2 
 _geom_torsion_site_symmetry_3 
 _geom_torsion_site_symmetry_4 
 _geom_torsion_publ_flag 
C2 C1 C3 C2 0.8(8) 2_556 . . . ? 
C2 C1 C3 C4 179.2(4) 2_556 . . . ? 
C1 C2 C3 C1 -0.8(8) 2_556 . . . ? 
C1 C2 C3 C4 -179.1(4) 2_556 . . . ? 
C5 C6 C7 C8 127.5(4) . . . . ? 
C13 C6 C7 C8 -113.8(5) . . . . ? 
C19 C6 C7 C8 8.6(6) . . . . ? 
C5 C6 C7 C12 -55.0(5) . . . . ? 
C13 C6 C7 C12 63.6(5) . . . . ? 
C19 C6 C7 C12 -174.0(4) . . . . ? 
C12 C7 C8 C9 1.1(6) . . . . ? 
C6 C7 C8 C9 178.5(4) . . . . ? 
C26 O2 C9 C10 1.1(7) . . . . ? 
C26 O2 C9 C8 -179.4(4) . . . . ? 
C7 C8 C9 O2 178.3(4) . . . . ? 
C7 C8 C9 C10 -2.2(7) . . . . ? 
O2 C9 C10 C11 -178.1(4) . . . . ? 
C8 C9 C10 C11 2.4(7) . . . . ? 
C9 C10 C11 C12 -1.6(7) . . . . ? 
C10 C11 C12 C7 0.6(7) . . . . ? 
C8 C7 C12 C11 -0.3(6) . . . . ? 
C6 C7 C12 C11 -177.8(4) . . . . ? 
C5 C6 C13 C14 142.5(4) . . . . ? 
C19 C6 C13 C14 -99.2(4) . . . . ? 
C7 C6 C13 C14 24.3(5) . . . . ? 
C5 C6 C13 C18 -44.4(5) . . . . ? 
C19 C6 C13 C18 73.9(5) . . . . ? 
C7 C6 C13 C18 -162.6(4) . . . . ? 
C18 C13 C14 C15 2.0(7) . . . . ? 
C6 C13 C14 C15 175.1(4) . . . . ? 
C25 O1 C15 C16 -3.2(7) . . . . ? 
C25 O1 C15 C14 174.8(5) . . . . ? 
C13 C14 C15 O1 -179.5(4) . . . . ? 
C13 C14 C15 C16 -1.3(7) . . . . ? 
O1 C15 C16 C17 178.3(4) . . . . ? 
C14 C15 C16 C17 0.4(7) . . . . ? 
C15 C16 C17 C18 -0.1(8) . . . . ? 
C14 C13 C18 C17 -1.6(7) . . . . ? 
C6 C13 C18 C17 -174.9(4) . . . . ? 
C16 C17 C18 C13 0.7(7) . . . . ? 
C5 C6 C19 C20 -34.3(6) . . . . ? 
C13 C6 C19 C20 -152.2(4) . . . . ? 
C7 C6 C19 C20 83.7(5) . . . . ? 
C5 C6 C19 C24 148.7(4) . . . . ? 
C13 C6 C19 C24 30.8(5) . . . . ? 
C7 C6 C19 C24 -93.2(5) . . . . ? 
C24 C19 C20 C21 -0.4(6) . . . . ? 
C6 C19 C20 C21 -177.5(4) . . . . ? 
C27 O3 C21 C20 -176.6(4) . . . . ? 
C27 O3 C21 C22 4.7(7) . . . . ? 
C19 C20 C21 O3 -179.9(4) . . . . ? 
C19 C20 C21 C22 -1.2(7) . . . . ? 
O3 C21 C22 C23 -179.4(4) . . . . ? 
C20 C21 C22 C23 1.9(7) . . . . ? 
C21 C22 C23 C24 -1.1(7) . . . . ? 
C22 C23 C24 C19 -0.5(7) . . . . ? 
C20 C19 C24 C23 1.3(6) . . . . ? 
C6 C19 C24 C23 178.4(4) . . . . ? 
C3S C1S C2S C3S -8(4) 2_566 . . . ? 
C1S C2S C3S C1S 7(2) . . . 2_566 ? 
C3SA C1SA C2SA C3SA -2(4) 2_566 . . . ? 
C1SA C2SA C3SA C1SA 2(3) . . . 2_566 ? 
 
_diffrn_measured_fraction_theta_max    0.971 
_diffrn_reflns_theta_full              20.50 
_diffrn_measured_fraction_theta_full   0.983 
_refine_diff_density_max    0.182 
_refine_diff_density_min   -0.236 
_refine_diff_density_rms    0.053 
